# Supplementary material for: Dynamic charge collecting mechanisms of cobalt phosphate on hematite photoanodes studied by photoinduced absorption spectroscopy
Source: Royal Society of Chemistry journal article supplement (doi:10.1039/d2sc05802b), 2023-01-01
Supplement: d2sc05802b1.pdf [file d2sc05802b1.pdf]

## Electronic Supplementary Information

### Dynamic Charge Collecting Mechanisms of Cobalt Phosphate on Hematite

#### Photoanode Studied by Photoinduced Absorption Spectroscopy

Dongfeng Li,<sup>ab</sup> Ruifang Wei,<sup>ac</sup> Heng Yin,<sup>a</sup> Hemin Zhang,<sup>d</sup> Xiuli Wang,<sup>a\*</sup> and Can Li<sup>abc\*</sup>

<sup>a</sup>State Key Laboratory of Catalysis, Dalian Institute of Chemical Physics, Chinese Academy of Sciences, Dalian National Laboratory for Clean Energy, Dalian 116023, China.

<sup>b</sup>University of Chinese Academy of Sciences, Beijing 100049, China

<sup>c</sup>Department of Chemical Physics, University of Science and Technology of China, Hefei 230026, China

<sup>d</sup>College of Materials Science and Engineering, Sichuan University, Engineering Research Center of Alternative Energy Materials and Devices, Ministry of Education, Chengdu 610065, China

### Table of Contents

|                                                                                                                                                                                                   |         |
|---------------------------------------------------------------------------------------------------------------------------------------------------------------------------------------------------|---------|
| 1. Experimental section .....                                                                                                                                                                     | S2-S6   |
| 2. Fitting PIA lifetimes .....                                                                                                                                                                    | S7-S8   |
| 3. CV curves for CoPi, bare Fe <sub>2</sub> O <sub>3</sub> and CoPi/Fe <sub>2</sub> O <sub>3</sub> anodes .....                                                                                   | S9      |
| 4. EIS results for CoPi, Fe <sub>2</sub> O <sub>3</sub> and CoPi electrodes .....                                                                                                                 | S10     |
| 5. CV of bare Fe <sub>2</sub> O <sub>3</sub> and CoPi/Fe <sub>2</sub> O <sub>3</sub> photoanodes with different scan rates under illumination .....                                               | S11     |
| 6. OCP of bare Fe <sub>2</sub> O <sub>3</sub> and CoPi/Fe <sub>2</sub> O <sub>3</sub> photoanodes .....                                                                                           | S12     |
| 7. SECA spectra of CoPi electrocatalyst .....                                                                                                                                                     | S13     |
| 8. CV of NiOOH/Fe <sub>2</sub> O <sub>3</sub> photoanode .....                                                                                                                                    | S14     |
| 9. TAS and TPC results of photoanodes under 0.8 V <sub>RHE</sub> .....                                                                                                                            | S15-S16 |
| 10. TAS results of CoPi, bare Fe <sub>2</sub> O <sub>3</sub> and CoPi/Fe <sub>2</sub> O <sub>3</sub> photoanodes under 1.5 V <sub>RHE</sub> .....                                                 | S17-S18 |
| 11. Ratios of PIA amplitudes and photocurrents for bare Fe <sub>2</sub> O <sub>3</sub> and CoPi/Fe <sub>2</sub> O <sub>3</sub> .....                                                              | S19-S20 |
| 12. Extinction coefficient of CoPi and photoinduced holes in Fe <sub>2</sub> O <sub>3</sub> .....                                                                                                 | S21-S22 |
| 13. TAS and TPC results of photoanodes under 1.4 V <sub>RHE</sub> .....                                                                                                                           | S23-S24 |
| 14. PIA spectra for bare Fe <sub>2</sub> O <sub>3</sub> -Ar, CoPi/Fe <sub>2</sub> O <sub>3</sub> -Ar, bare Fe <sub>2</sub> O <sub>3</sub> -air and CoPi/Fe <sub>2</sub> O <sub>3</sub> -air ..... | S25     |
| 15. CV curves of porous-Fe <sub>2</sub> O <sub>3</sub> and CoPi/porous-Fe <sub>2</sub> O <sub>3</sub> photoanodes .....                                                                           | S26     |
| 16. PIA spectra and photocurrents for CoPi/porous-Fe <sub>2</sub> O <sub>3</sub> .....                                                                                                            | S27     |
| 17. Linear relationship of PIA intensity and hole density .....                                                                                                                                   | S28-S29 |
| 18. PIA spectra of CoPi/F-Fe <sub>2</sub> O <sub>3</sub> , CoPi/SnO <sub>2</sub> /Fe <sub>2</sub> O <sub>3</sub> and CoPi/Fe <sub>2</sub> O <sub>3</sub> /Ta-Fe <sub>2</sub> O <sub>3</sub> ..... | S30-S31 |
| 19. References .....                                                                                                                                                                              | S32-S33 |

## Experimental section

All the reagents are used as received without further purification. All aqueous solutions including sample preparation and electrolytes were prepared with deionized pure water ( $> 18.2 \text{ M}\Omega/\text{cm}$ ). Unless mentioned otherwise, all of the experiments were conducted under normal atmospheric conditions.

### Sample preparation

**Preparation of FeOOH films.** FeOOH films were prepared by solvothermal deposition method.<sup>1</sup> The substrates of FTO ( $1.5 \text{ cm} \times 2 \text{ cm}$ , Nippon Sheet Glass Company, Japan) were firstly cleaned in acetone, isopropanol, ethanol and deionized water for 20 min respectively. The clean FTO was attached with tape on the glass side and placed leaned against the wall of the vessel. Afterwards, 50 mL solution containing 0.1 M  $\text{FeCl}_3 \cdot 6\text{H}_2\text{O}$  and 0.225 M  $\text{CO}(\text{NH}_2)_2$  (dense sample) or 1 M  $\text{NaNO}_3$  (porous sample) was added. Then the vessel was sealed and placed in the oven at  $100 \text{ }^\circ\text{C}$  for 4 h. Finally, the deposited FeOOH film was washed by deionized water.

**Surface doping with tin.** For the surface doping of Sn, firstly 0.1 M  $\text{SnCl}_2$  ethanol solution was prepared by dissolving 0.9024 g  $\text{SnCl}_2 \cdot 2\text{H}_2\text{O}$  in 40 mL absolute ethanol. Then the FeOOH film was immersed in the solution for 10 min.<sup>2</sup> Finally, the electrode was swept to dry by compressed air, and annealed at  $550 \text{ }^\circ\text{C}$  for 3 h, followed by heat treatment at  $750 \text{ }^\circ\text{C}$  for 15 min. The as-obtained dense samples were labeled as  $\text{Fe}_2\text{O}_3$ . The as-obtained porous samples were labeled as porous- $\text{Fe}_2\text{O}_3$ .

**Deposition of CoPi overlayer.** Electrodeposition of CoPi overlayer on FTO,  $\text{Fe}_2\text{O}_3$ , and porous- $\text{Fe}_2\text{O}_3$  photoelectrodes was carried out by modified procedures published elsewhere.<sup>3</sup> The employed electrolyte contained 0.5 mM  $\text{Co}(\text{NO}_3)_2 \cdot 2\text{H}_2\text{O}$  in

0.1 M phosphate buffer (pH 6.77). The working electrode was subjected to 1.6 V<sub>RHE</sub> with 5 min. The obtained samples were denoted as CoPi, CoPi/Fe<sub>2</sub>O<sub>3</sub> and CoPi/porous-Fe<sub>2</sub>O<sub>3</sub>.

**Deposition of NiOOH overlayer.** Electrodeposition of NiOOH overlayer on Fe<sub>2</sub>O<sub>3</sub> photoelectrode or FTO was prepared by reported electrodeposition methods<sup>4</sup> with solution of 0.1 M NaOAc with 16 mM NiOAc. Electrodeposition was performed five times by consecutive linear sweeps from 1.7 to 2.0 V<sub>RHE</sub> at 10 mV/s. The obtained samples were named as NiOOH and NiOOH/Fe<sub>2</sub>O<sub>3</sub>.

**Regulation of oxygen vacancy for hematite photoanode.**<sup>5</sup> For decreasing oxygen vacancy, as-prepared Fe<sub>2</sub>O<sub>3</sub> was annealed at 600 °C for 2 h in air, which is named as Fe<sub>2</sub>O<sub>3</sub>-air. In order to increase oxygen vacancy, as-prepared Fe<sub>2</sub>O<sub>3</sub> was annealed at 600 °C for 2 h in pure argon flow in a tube furnace. The obtained sample was denoted as Fe<sub>2</sub>O<sub>3</sub>-Ar. After CoPi modification on hematite photoanodes of regulating oxygen vacancy, they were noted as CoPi/Fe<sub>2</sub>O<sub>3</sub>-air and CoPi/Fe<sub>2</sub>O<sub>3</sub>-Ar.

**Surface doping with fluorine.**<sup>6</sup> Fe<sub>2</sub>O<sub>3</sub> film was immersed in 0.05 M NaF solution for 10 min, followed calcination at 400 °C for 30 min in furnace. The obtained samples were termed as F-Fe<sub>2</sub>O<sub>3</sub>.

**Tantalum doping and constructing homojunction.** The preparation processes of high-performance homojunction samples (Fe<sub>2</sub>O<sub>3</sub>/Ta-Fe<sub>2</sub>O<sub>3</sub>) were coincident with our previous work.<sup>7</sup>

**Insulator modification with SnO<sub>2</sub>.**<sup>8</sup> Fe<sub>2</sub>O<sub>3</sub> film was immersed in 0.02 M SnCl<sub>4</sub>•5H<sub>2</sub>O and 1 M CO(NH<sub>2</sub>)<sub>2</sub> solution and deposited for 20 min at 100 °C in the oven, followed calcination at 500 °C for 2 h in furnace. The prepared samples were

named as SnO<sub>2</sub>/Fe<sub>2</sub>O<sub>3</sub>.

### **Photoelectrochemical (PEC) measurements**

The electrolyte for PEC or electrochemical water oxidation measurements was 1 M NaOH aqueous solution (pH 13.7). A three-electrode setup controlled by a CHI 760C potentiostat was employed with Fe<sub>2</sub>O<sub>3</sub> as the working electrode, Ag/AgCl/saturated KCl (Ag/AgCl) as the reference electrode, and Pt foil as the counter electrode. Potentials measured versus Ag/AgCl were converted to reversible hydrogen electrode (RHE),  $E_{\text{RHE}} = E_{\text{Ag/AgCl}} + 0.1981 \text{ V} + 0.0591 \text{ V} \cdot \text{pH}$ . Unless mentioned otherwise, all of the potentials were versus RHE. The photoelectrodes were illuminated from the electrolyte-electrode interface.

Electrochemical impedance spectroscopy (EIS) of photoelectrodes under illumination and dark were carried out using an electrochemical workstation (VersaSTAT MC) from 10<sup>5</sup> Hz to 10<sup>-1</sup> Hz with a signal amplitude of 10 mV.

Cyclic voltammetry (CV) with various scan rates and open circuit potential (OCP) with chopped light of photoelectrodes were conducted by a CHI 760C potentiostat.

### **Photoinduced absorption (PIA) spectroscopy**

The PIA spectroscopy was performed using long-pulsed ( $\approx$  s) LED light source to generate photoinduced charges in the photoanode.<sup>9</sup> The interval of light on/light off was controlled by a wavefunction generator (0.09 Hz and 50 % duty ratio), which simultaneously sent a trigger signal to oscilloscope (Tektronics TDS 2012c) and DAQ card (National Instruments NI USB-6211). During collecting PIA spectra, the illumination duration was  $\sim$ 5 s, followed by  $\sim$ 5 s in the dark. Meanwhile, a monochromatic probe light (for example, 694.3 nm) from a tungsten halogen lamp

(Bentham IL1 Tungsten Halogen lamp) was used to monitor the photogenerated charges dynamics on photoelectrode.<sup>3</sup> The optical density difference ( $\Delta OD$ ) of probe light was monitored using a Si photodiode detector (Hamamatsu S3071). A potentiostat (CHI 760C) was used to provide a constant applied potential and collect the transient photocurrent data.

### **Electroinduced absorption (EIA) spectroscopy**

When collecting EIA spectroscopy, the potential pulse instead of light pulse in PIA spectroscopy was applied to induce the absorption variation. After the electrode was stabilized  $\sim 20$  s under constant potential using chronoamperometry, the absorption spectra were recorded. SECA spectrum is the difference of absorption spectra under two potentials.

### **Spectroelectrochemical absorption (SECA) spectroscopy**

When collecting SECA spectroscopy,<sup>10</sup> the potential instead of light was applied to induce the absorption variation. After the electrode was stabilized  $\sim 20$  s under constant potential using chronoamperometry (V650, Jasco), the absorption spectra were recorded. SECA spectrum is the difference of absorption spectra under two potentials.

### **Transient absorption spectroscopy (TAS) and transient photocurrent (TPC)**

TAS and TPC measurements were carried out using the third harmonic of a Nd:YAG laser (Opolette HE-355-LD, 355 nm, 7 ns pulse width, 1.05 s period) as the pump light. A liquid light guide transmitted the laser pulse to the sample resulting in an incident pump intensity of ca. 225  $\mu\text{J}/\text{pulse}$  (355 nm). A 100 W tungsten lamp (Bentham, IL 1) coupled to a monochromator (Zolix, Omni -  $\lambda$  300) was used as the

probe light. Variation in optical density ( $\Delta OD$ ) of the sample was calculated by measuring the transmitted light using a Si photodiode (Hamamatsu) and an amplification system coupled to both an oscilloscope (Tektronix, TDS 2012C) and data acquisition card (National Instruments NI-6221). The data were averaged over 300 laser shots. The operando TAS and TPC experiments were implemented by three-electrode setup controlled by a CHI 760C potentiostat in 1M NaOH solution (pH = 13.7), with the photoanode, Pt, and Ag/AgCl as working, counter and reference electrodes, respectively. During TAS and TPC measurements, a constant potential was maintained by chronoamperometry.

Table. S1 For PIA results in Fig. 3a and 3c, the accumulation and dissipation lifetimes in Fe<sub>2</sub>O<sub>3</sub> and CoPi/Fe<sub>2</sub>O<sub>3</sub> photoanodes are calculated and fitted by using mono-exponential and bi-exponential function:  $y = y_0 + A_1 \cdot \exp((t-t_0)/\tau_1)$  or  $y = y_0 + A_1 \cdot \exp((t-t_0)/\tau_1) + A_2 \cdot \exp((t-t_0)/\tau_2)$ , respectively.  $Y_0$  is the intercept.  $T_0$  is initial points of accumulated or dissipative processes.  $A_1$  and  $A_2$  are the amplitudes.  $\tau_1$  and  $\tau_2$  are fitting lifetimes. The average lifetime of  $\tau_{ave}$  is calculated by equation:  $\tau_{ave} = (A_1 \cdot \tau_1 + A_2 \cdot \tau_2)/(A_1 + A_2)$ .  $A_1$ ,  $A_2$ ,  $\tau_1$  and  $\tau_2$  are the parameters in Table S1.

| Fe <sub>2</sub> O <sub>3</sub> |                      |                    |                          |                      |                    |                      |                    |                          |
|--------------------------------|----------------------|--------------------|--------------------------|----------------------|--------------------|----------------------|--------------------|--------------------------|
| Potential                      | Accumulated lifetime |                    |                          | Dissipative lifetime |                    |                      |                    |                          |
| V <sub>RHE</sub>               | A <sub>1</sub> (ΔOD) | τ <sub>1</sub> (s) | τ <sub>average</sub> (s) | A <sub>1</sub> (ΔOD) | τ <sub>1</sub> (s) | A <sub>2</sub> (ΔOD) | τ <sub>2</sub> (s) | τ <sub>average</sub> (s) |
| 0.6                            | —                    | —                  | —                        | —                    | —                  | —                    | —                  | —                        |
| 0.7                            | —                    | —                  | —                        | —                    | —                  | —                    | —                  | —                        |
| 0.8                            | —                    | —                  | —                        | —                    | —                  | —                    | —                  | —                        |
| 0.9                            | —                    | —                  | —                        | —                    | —                  | —                    | —                  | —                        |
| 1.0                            | -5.48E-5             | 0.41               | 0.41                     | 5.03E-5              | 0.04               | 4.28E-5              | 1.28               | 0.61                     |
| 1.1                            | -2.03E-4             | 0.53               | 0.53                     | 8.56E-5              | 0.41               | 1.06E-4              | 1.73               | 1.14                     |
| 1.2                            | -3.58E-4             | 0.54               | 0.54                     | 6.32E-5              | 0.20               | 2.92E-4              | 1.48               | 1.25                     |
| 1.3                            | -4.13E-4             | 0.52               | 0.52                     | 1.03E-4              | 0.28               | 3.20E-4              | 2.11               | 1.66                     |
| 1.4                            | -3.84E-4             | 0.44               | 0.44                     | 8.85E-5              | 0.15               | 3.07E-4              | 1.61               | 1.28                     |
| 1.5                            | -3.76E-4             | 0.39               | 0.39                     | 1.15E-4              | 0.19               | 2.74E-4              | 1.75               | 1.29                     |
| 1.6                            | -3.61E-4             | 0.35               | 0.35                     | 1.03E-4              | 0.18               | 2.79E-4              | 1.60               | 1.22                     |

| CoPi/Fe <sub>2</sub> O <sub>3</sub> |                      |                    |                          |                      |                    |                      |                    |                          |
|-------------------------------------|----------------------|--------------------|--------------------------|----------------------|--------------------|----------------------|--------------------|--------------------------|
| Potential                           | Accumulated lifetime |                    |                          | Dissipative lifetime |                    |                      |                    |                          |
| V <sub>RHE</sub>                    | A <sub>1</sub> (ΔOD) | τ <sub>1</sub> (s) | τ <sub>average</sub> (s) | A <sub>1</sub> (ΔOD) | τ <sub>1</sub> (s) | A <sub>2</sub> (ΔOD) | τ <sub>2</sub> (s) | τ <sub>average</sub> (s) |
| 0.6                                 | —                    | —                  | —                        | —                    | —                  | —                    | —                  | —                        |
| 0.7                                 | -5.18E-5             | 2.42               | 2.42                     | —                    | —                  | 5.38E-5              | 1.55               | 1.55                     |
| 0.8                                 | -4.64E-4             | 3.26               | 3.26                     | —                    | —                  | 3.58E-4              | 2.81               | 2.8                      |
| 0.9                                 | -1.80E-3             | 3.77               | 3.77                     | —                    | —                  | 1.32E-3              | 2.88               | 2.88                     |
| 1.0                                 | -2.47E-3             | 3.77               | 3.77                     | —                    | —                  | 1.80E-3              | 2.88               | 2.88                     |
| 1.1                                 | -1.88E-3             | 1.89               | 1.89                     | —                    | —                  | 1.65E-3              | 2.33               | 2.33                     |
| 1.2                                 | -1.50E-3             | 1.14               | 1.14                     | 7.67E-5              | 0.23               | 1.30E-3              | 2.06               | 1.96                     |
| 1.3                                 | -1.36E-3             | 0.90               | 0.90                     | 1.19E-4              | 0.14               | 1.16E-3              | 1.88               | 1.72                     |
| 1.4                                 | -1.33E-3             | 0.75               | 0.75                     | 7.75E-5              | 0.15               | 1.14E-3              | 1.76               | 1.66                     |
| 1.5                                 | -1.27E-3             | 0.70               | 0.70                     | 1.29E-4              | 0.17               | 1.04E-3              | 1.80               | 1.61                     |
| 1.6                                 | -1.22E-3             | 0.62               | 0.62                     | 1.98E-4              | 0.23               | 9.38E-4              | 1.77               | 1.50                     |



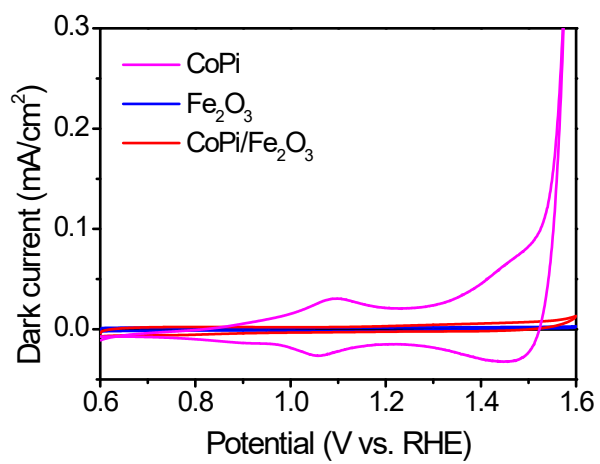

Fig. S1 CV curves for CoPi, bare Fe<sub>2</sub>O<sub>3</sub> and CoPi/Fe<sub>2</sub>O<sub>3</sub> anodes in dark.

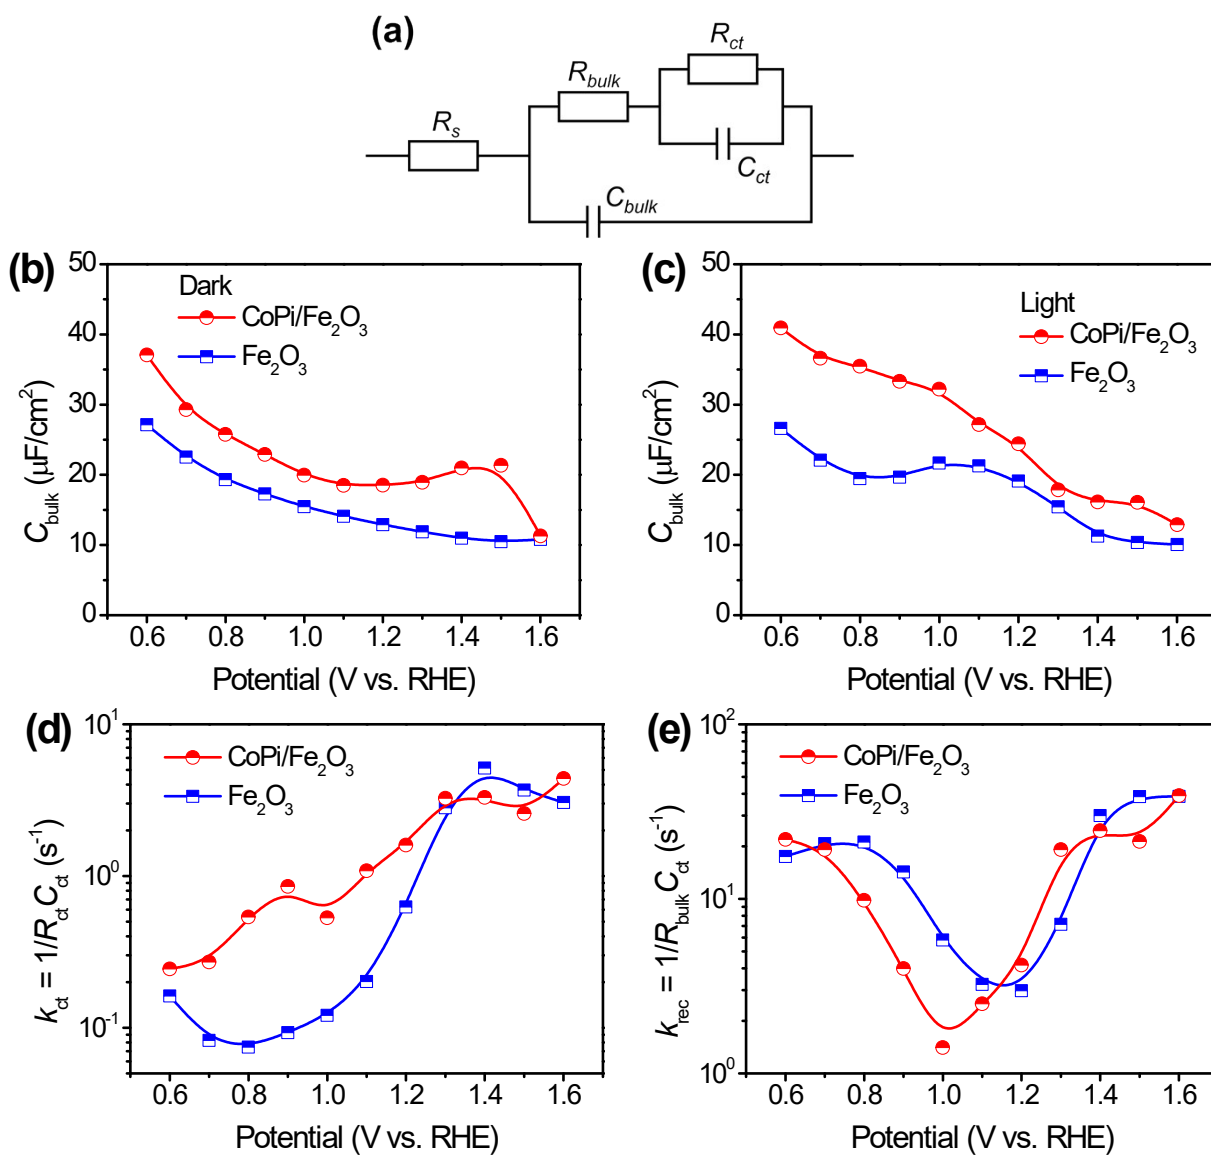

Fig. S2 EIS results for CoPi, Fe<sub>2</sub>O<sub>3</sub> and CoPi electrodes. (a) Equivalent circuit. Bulk capacitance of in dark (b) and under illumination (c). Rate constants of charge transfer (d) and recombination (e) under illumination. Irradiation: 456 nm LED (5 mW/cm<sup>2</sup>).

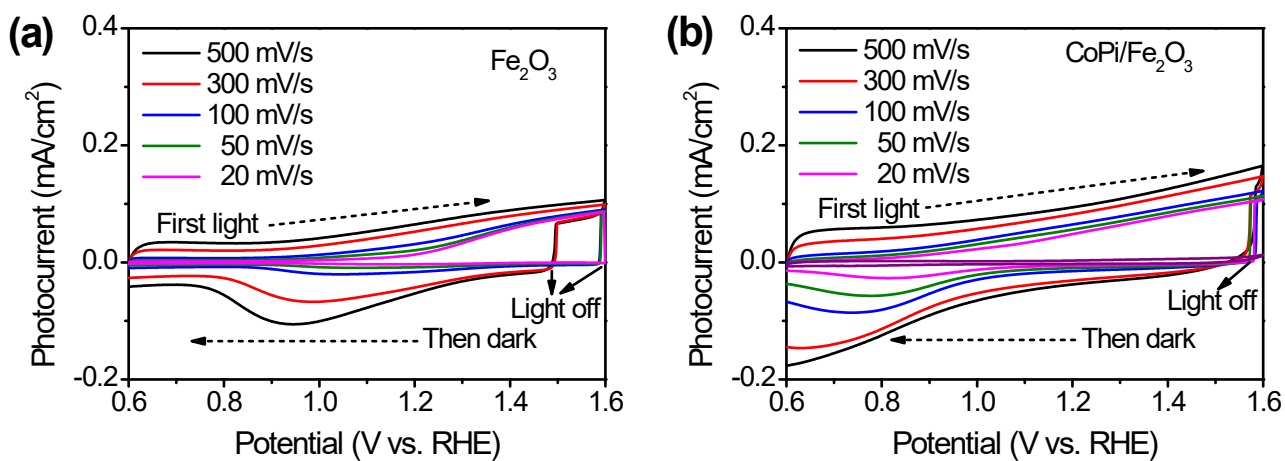

Fig. S3 CV of (a) bare Fe<sub>2</sub>O<sub>3</sub> and CoPi/Fe<sub>2</sub>O<sub>3</sub> photoanodes with different scan rates under illumination (first positive scan from low potential) and dark (following negative scan from high potential). Irradiation: 456 nm LED (5 mW/cm<sup>2</sup>).

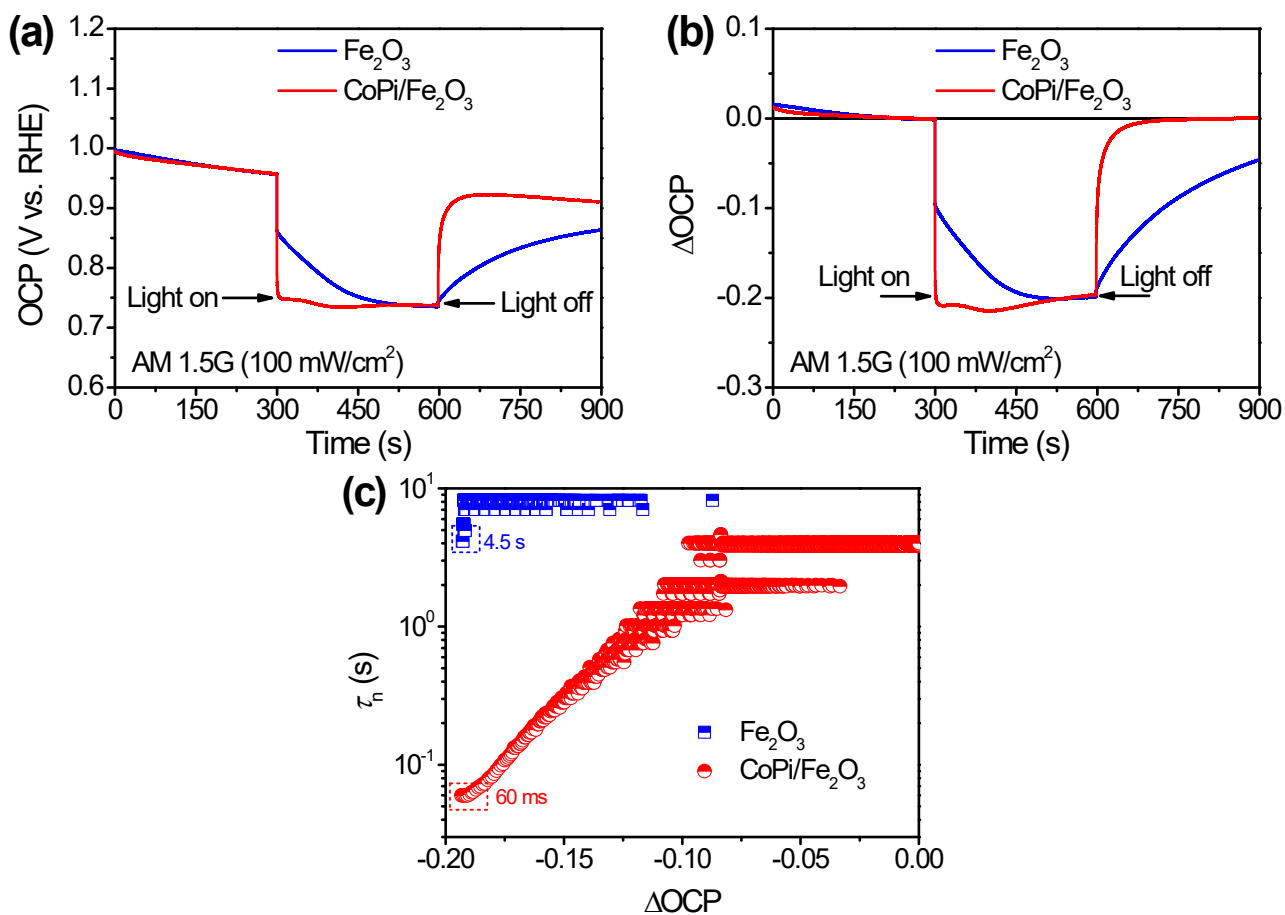

Fig. S4 The (a) raw and (b) corrected OCP with chopped light of bare Fe<sub>2</sub>O<sub>3</sub> and CoPi/Fe<sub>2</sub>O<sub>3</sub> photoanodes (illumination: AM 1.5G, 100 mW/cm<sup>2</sup>). (c) Calculated decay

life of OCP by function<sup>11</sup> of  $\tau_n = \frac{k_B T}{e} \left( \frac{dOCP}{dt} \right)^{-1}$ , where  $\tau_n$ ,  $k_B$ ,  $T$ ,  $e$  and  $dOCP/dt$  are the carrier lifetime, Boltzmann's constant, temperature (K), charge of single electron and derivative of the OCP decay, respectively. The initial decay lifetimes ( $\tau_0$ ) after turning light off for Fe<sub>2</sub>O<sub>3</sub> and CoPi/Fe<sub>2</sub>O<sub>3</sub> are 4.5 s and 60 ms, respectively.

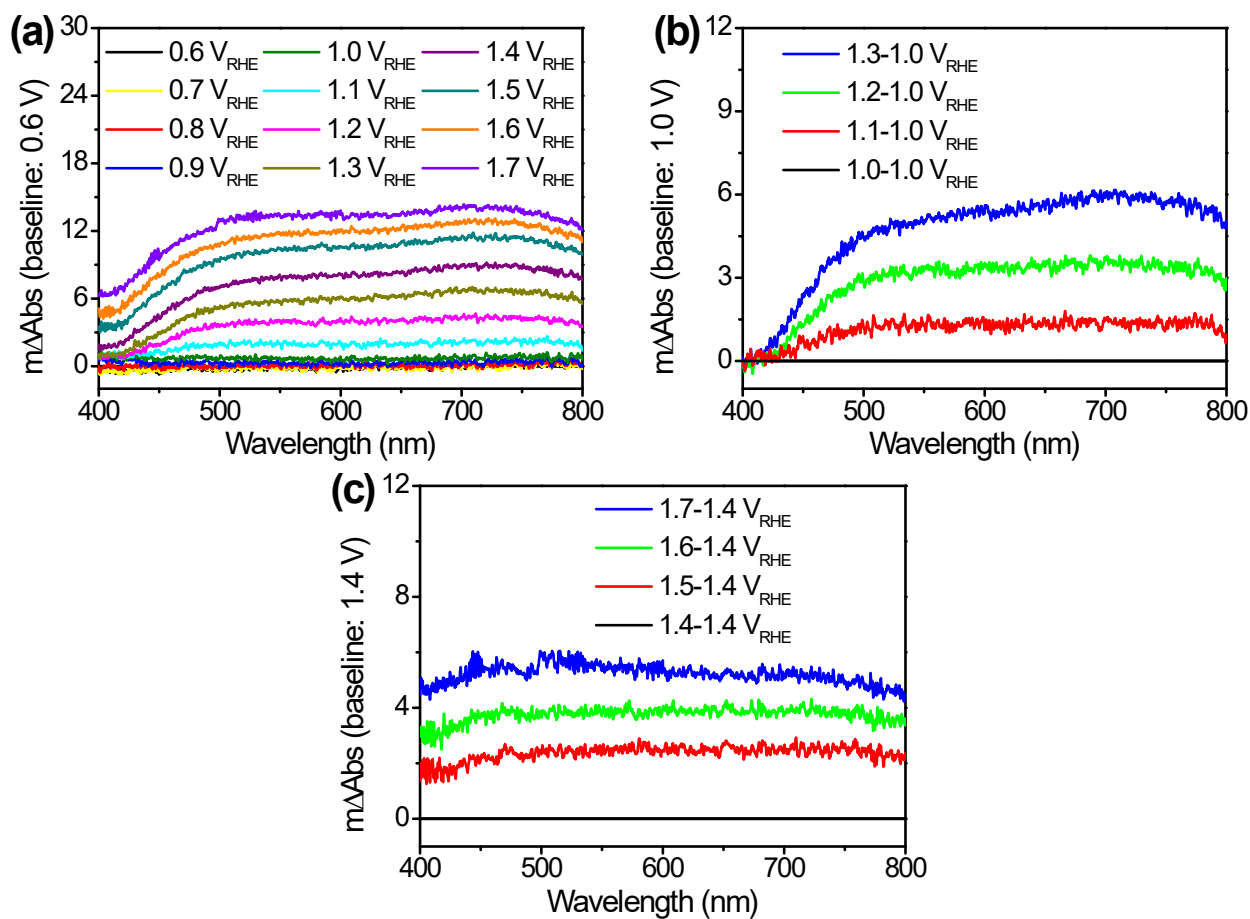

Fig. S5 SECA spectra of CoPi electrocatalyst at different baselines of (a) 0.6, (b) 1.0 and (c) 1.4 V<sub>RHE</sub>. The baselines of 1.0 V<sub>RHE</sub> and 1.4 V<sub>RHE</sub> are used to identify the typical absorption spectra of Co<sup>2+/3+</sup> and Co<sup>3+/4+</sup> transition, respectively.

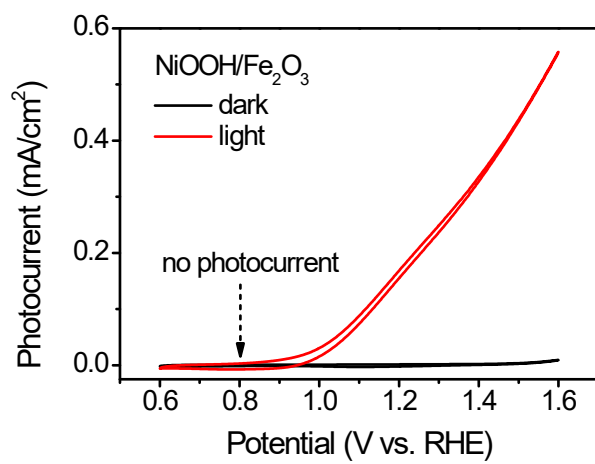

Fig. S6 CV of NiOOH/Fe<sub>2</sub>O<sub>3</sub> photoanode with/without illumination (AM 1.5G: 100 mW/cm<sup>2</sup>).

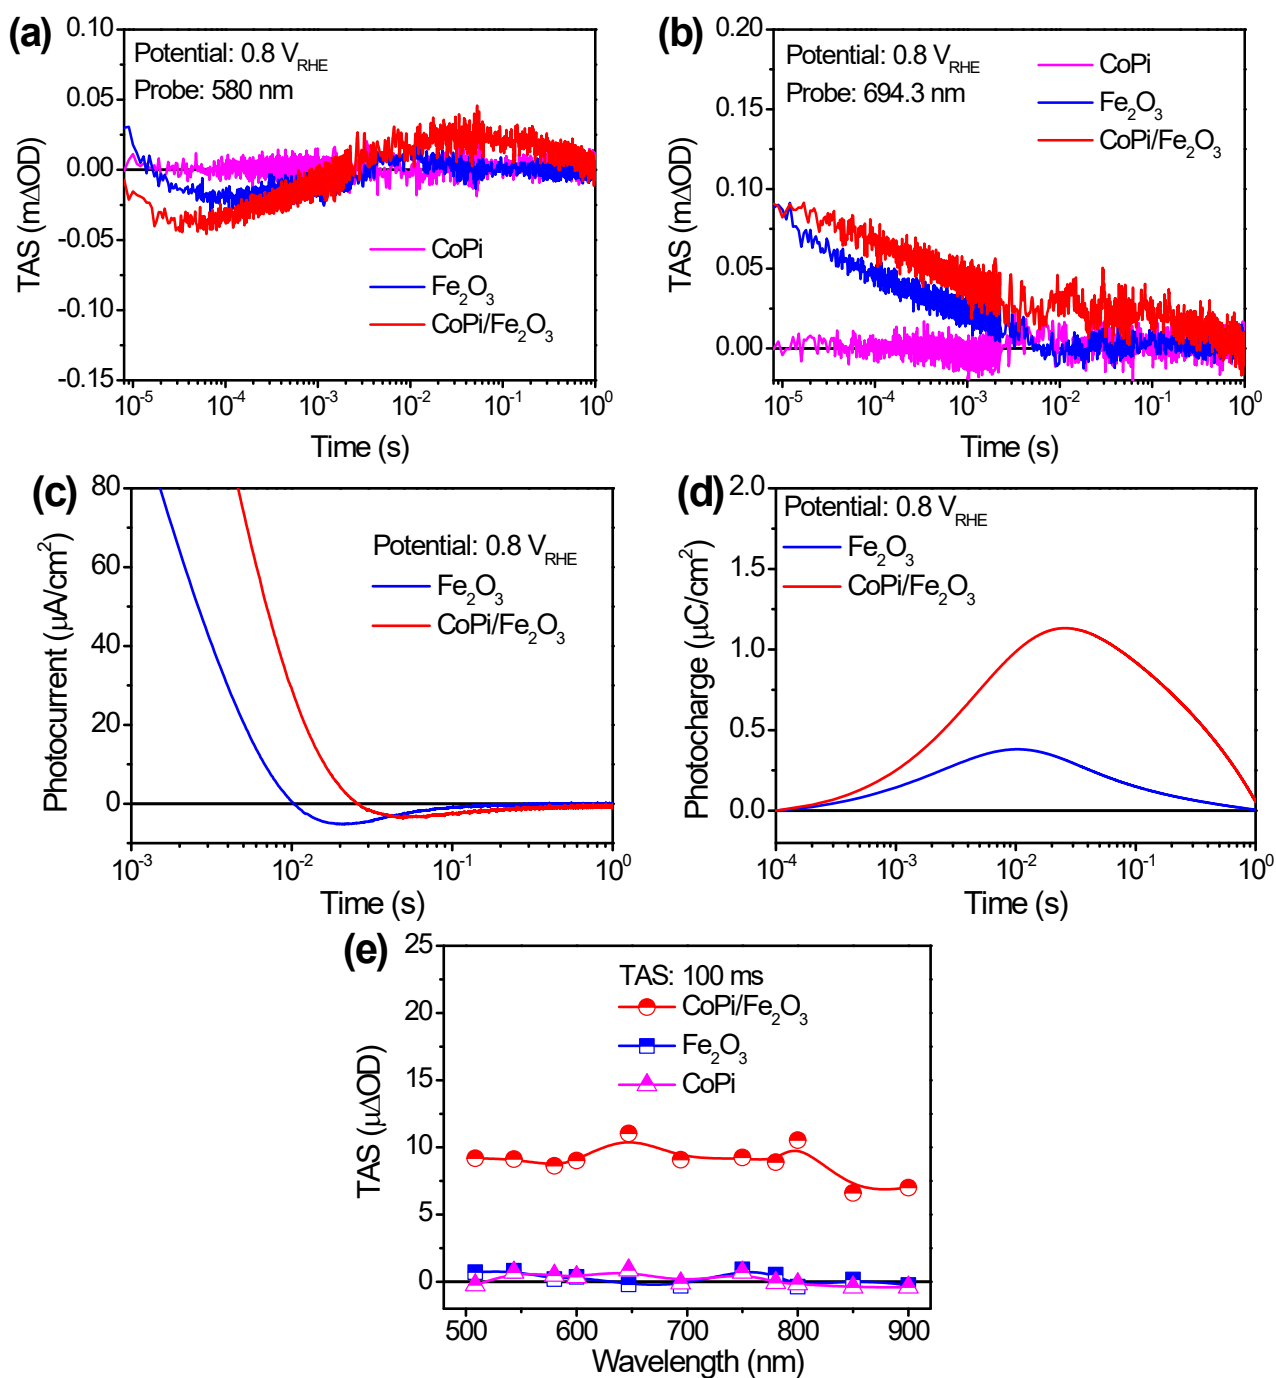

Fig. S7 TAS results at (a) 580 or (b) 694.3 nm of CoPi, bare Fe<sub>2</sub>O<sub>3</sub> and CoPi/Fe<sub>2</sub>O<sub>3</sub> photoanodes under 0.8 V<sub>RHE</sub>. (c) TPC results and (d) integrated charge of bare Fe<sub>2</sub>O<sub>3</sub> and CoPi/Fe<sub>2</sub>O<sub>3</sub> photoanodes excited by nanosecond laser pulse under 0.8 V<sub>RHE</sub>. (e) Transient absorption spectra at 100 ms of three electrodes at 0.8 V<sub>RHE</sub>.

In Fig. S7e, transient absorption spectra at 100 ms at low applied potential of 0.8 V<sub>RHE</sub> display a broad absorption which is quite similar to the absorption spectra of

oxidized  $\text{Co}^{3+}$  in Fig. S5b, demonstrating that the long-lived transient absorption signals in  $\text{CoPi}/\text{Fe}_2\text{O}_3$  at lower potential should be originated from cobalt oxidation of  $\text{Co}^{2+/3+}$ . Moreover, this result demonstrates that cobalt oxidation by trapped holes starts occurring before 100 ms.



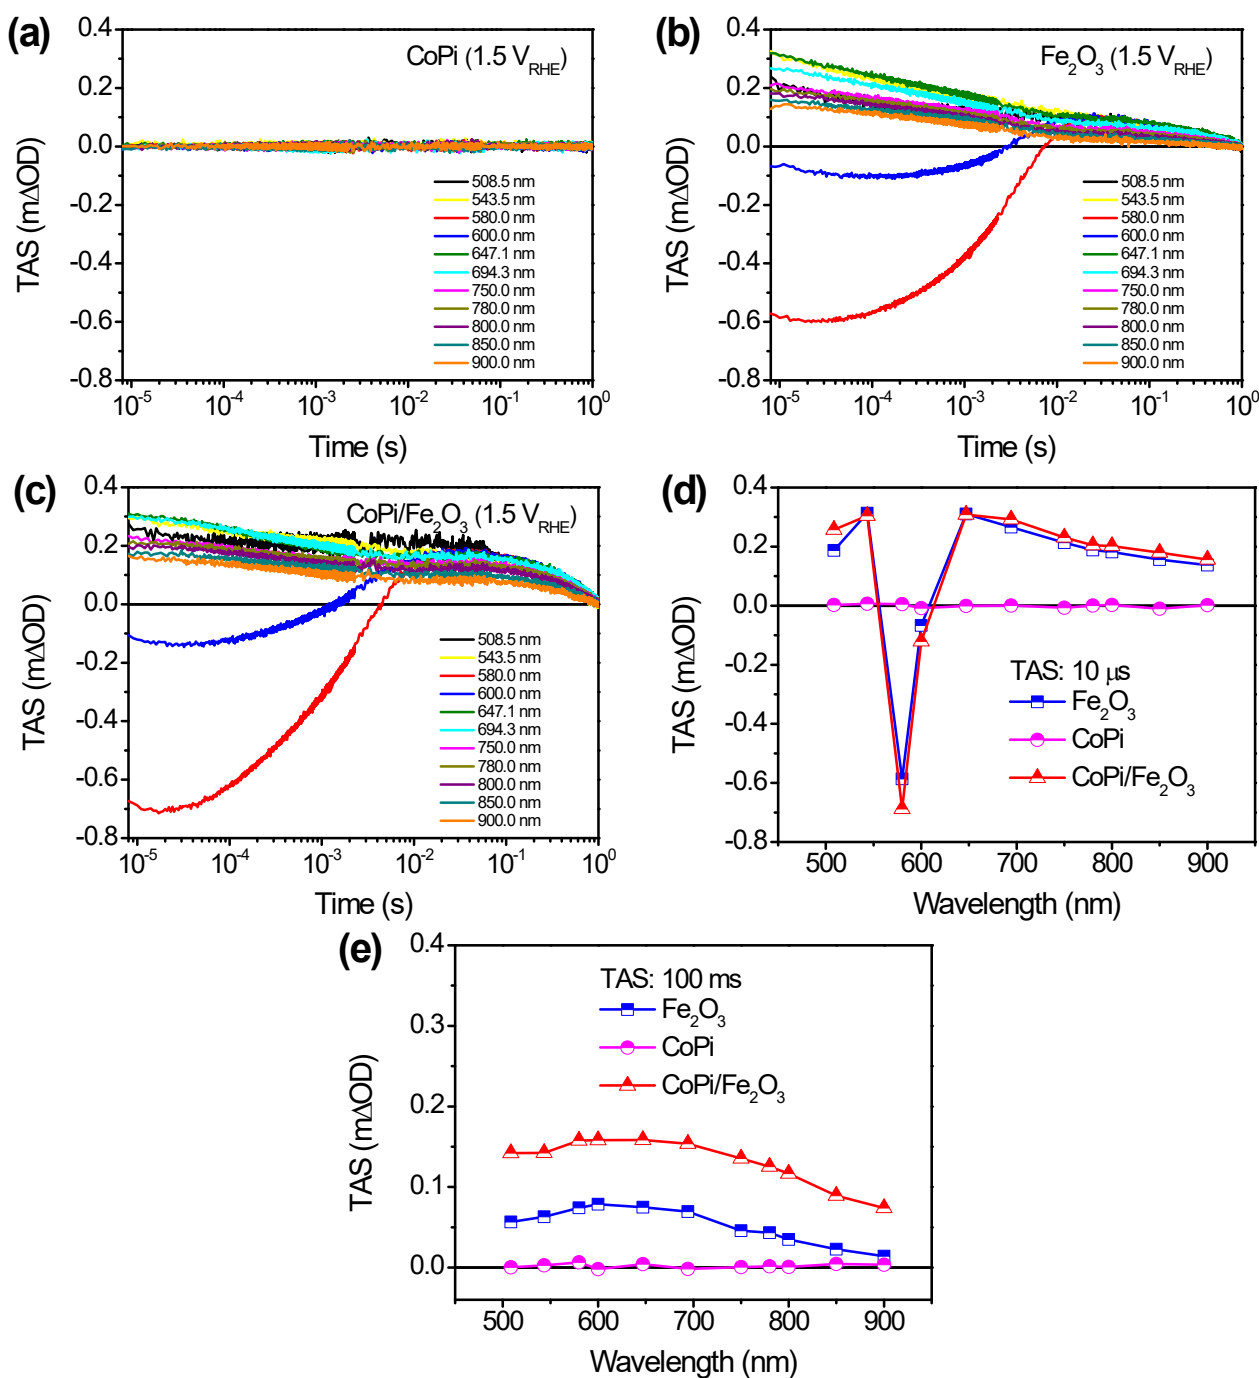

Fig. S8 TAS results of (a) CoPi, (b) bare Fe<sub>2</sub>O<sub>3</sub> and (c) CoPi/Fe<sub>2</sub>O<sub>3</sub> photoanodes under 1.5 V<sub>RHE</sub>. Transient absorption spectra at (d) 10 μs and (e) 100 ms of three electrodes extracted from Figs. S8a–c.

Similar to PIA spectra, transient absorption spectra of CoPi/Fe<sub>2</sub>O<sub>3</sub> photoanode at 100 ms at 1.5 V<sub>RHE</sub> show similar spectra shape but higher amplitude relative to that of Fe<sub>2</sub>O<sub>3</sub>, demonstrating the same surface species. The higher TA amplitude of

CoPi/Fe<sub>2</sub>O<sub>3</sub> at 100 ms demonstrates that the cobalt oxidation by VB holes starts occurring before 100 ms.

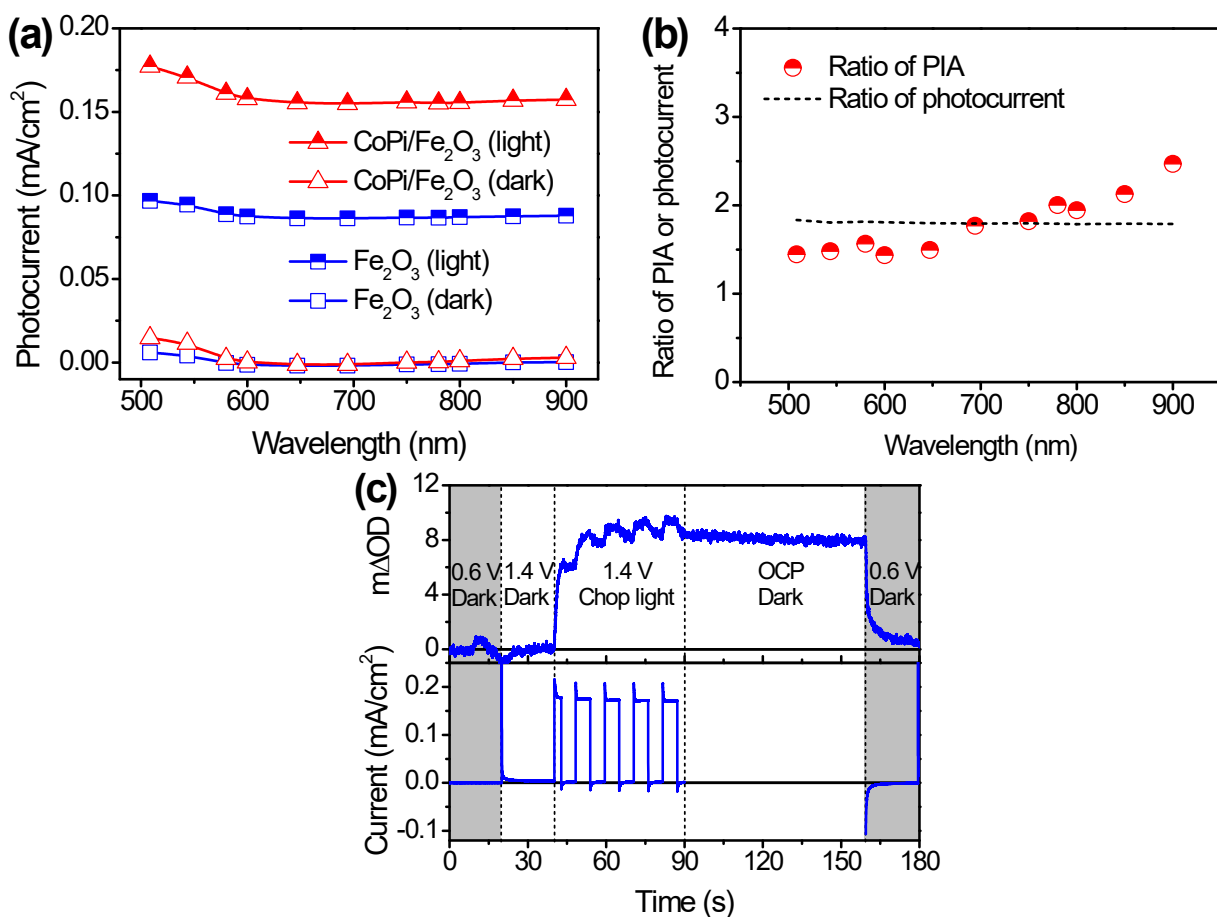

Fig. S9 (a) The corresponding photocurrents during PIA measurement for bare Fe<sub>2</sub>O<sub>3</sub> and CoPi/Fe<sub>2</sub>O<sub>3</sub> photoanodes. (b) The ratios of PIA amplitudes and photocurrents for bare Fe<sub>2</sub>O<sub>3</sub> and CoPi/Fe<sub>2</sub>O<sub>3</sub>. (c) The change of PIA for CoPi/Fe<sub>2</sub>O<sub>3</sub> photoanode at step potential and/or chop light. Pump: 456 nm (5 mW/cm<sup>2</sup>); probe: 694.3 nm.

For CoPi/Fe<sub>2</sub>O<sub>3</sub> photoanode, step potential from 0.6 V<sub>RHE</sub> to 1.4 V<sub>RHE</sub> in dark doesn't induce obvious change of optical density (Fig. S9c), which is in good agreement with the negligible dark current in CV of CoPi/Fe<sub>2</sub>O<sub>3</sub> in Fig.S1. This result further confirms that the potential of 1.4 V<sub>RHE</sub> cannot effectively oxidize loaded CoPi to Co<sup>3+</sup> due to poor conductivity of dense Fe<sub>2</sub>O<sub>3</sub>. After applying chop light, a considerable increase of absorption amplitude is observed. Several light-dark cycles

will stabilize the optical density of CoPi/Fe<sub>2</sub>O<sub>3</sub> at a quasi-steady-state state. These results should be due to the oxidation process of Co<sup>2+/3+</sup>, since CoPi is oxidized to Co<sup>3+</sup> via the sequential and direct hole transfer processes in light-dark cycle measurement (Fig. S9c). The oxidation of Co<sup>2+/3+</sup> is almost finished in about four light-dark cycles and stabilized in Co<sup>3+</sup> states under 1.4 V<sub>RHE</sub>. Since the PIA data in main text are quasi-steady-state PIA spectra measured with continuous pulsed light on, the initial states of cobalt ions in CoPi/Fe<sub>2</sub>O<sub>3</sub> for PIA under 1.4 V<sub>RHE</sub> should be Co<sup>3+</sup> states.

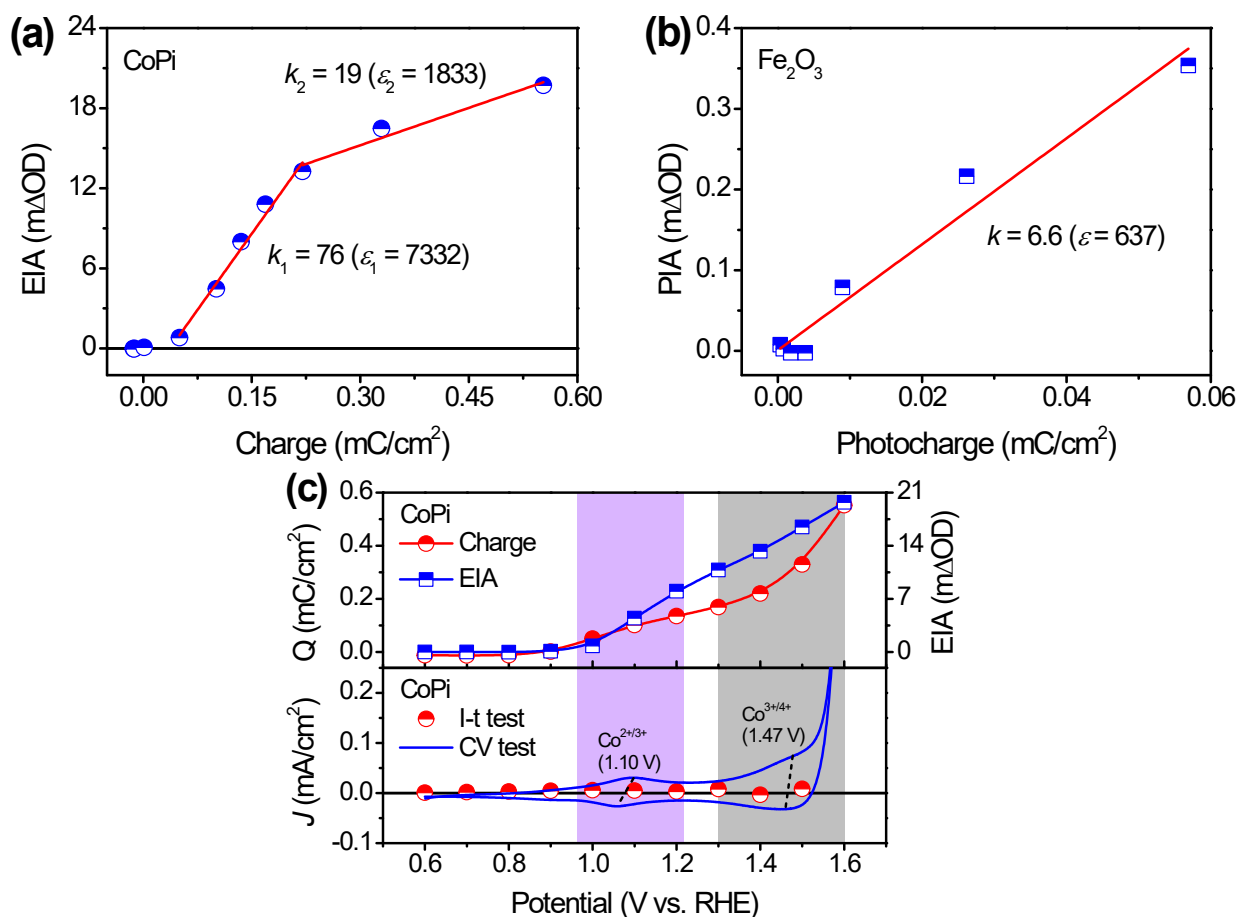

Fig. S10 Extinction coefficient of high-valent cobalt species in CoPi (a) and photoinduced holes in Fe<sub>2</sub>O<sub>3</sub> (b) at probe wavelength of 694.3 nm. (c) Comparison of potential-dependent charges, EIA spectra, I-t and CV current for CoPi. Charges and EIA spectra were collected by step potential with 0.6 V<sub>RHE</sub> baseline.

Extinction coefficient ( $\epsilon$ ) is calculated by linear relation between absorbance ( $\Delta OD$ ) at a specific wavelength (694.3 nm) and the concentration of charge (mC/cm<sup>2</sup>),  $\Delta OD = k \cdot c$ , where the unit for slope  $k$  is  $cm^2 C^{-1}$ .<sup>10</sup> By unit conversion, the extinction coefficient can be obtained from slope  $k$ :  $1 (cm^2 C^{-1}) = 96.48 M^{-1} cm^{-1}$ .

The concentration of high-valent cobalt species in CoPi and photoinduced holes in Fe<sub>2</sub>O<sub>3</sub> is obtained by integrating the charge of multiple step potential measurement.

The spectroscopic intensity was collected by fixed potential baseline at 0.6  $V_{\text{RHE}}$ . In Fig. S10a, CoPi shows two extinction coefficients, which are transition of  $\text{Co}^{2+} \rightarrow \text{Co}^{3+}$  ( $\epsilon_1 = 7,332 \text{ M}^{-1} \text{ cm}^{-1}$ ) and  $\text{Co}^{3+} \rightarrow \text{Co}^{4+}$  ( $\epsilon_2 = 1,833 \text{ M}^{-1} \text{ cm}^{-1}$ ), respectively. The transitions of both  $\text{Co}^{2+} \rightarrow \text{Co}^{3+}$  and  $\text{Co}^{3+} \rightarrow \text{Co}^{4+}$  induced by photoinduced holes in  $\text{Fe}_2\text{O}_3$  will lead to increased spectroscopic absorption.

From Fig. S10a and S10c,  $\text{Co}^{4+}$  species in CoPi has been appeared with  $\sim 1.3 V_{\text{RHE}}$  potential and displays the second extinction coefficient. But the steady-state currents only appear above 1.5  $V_{\text{RHE}}$ , illustrating that if  $\text{Co}^{4+}$  species participates in water oxidation reaction, it needs to accumulate a certain amount. When the accumulated amount is not enough, CoPi is only used to store holes but with weak reactivity.

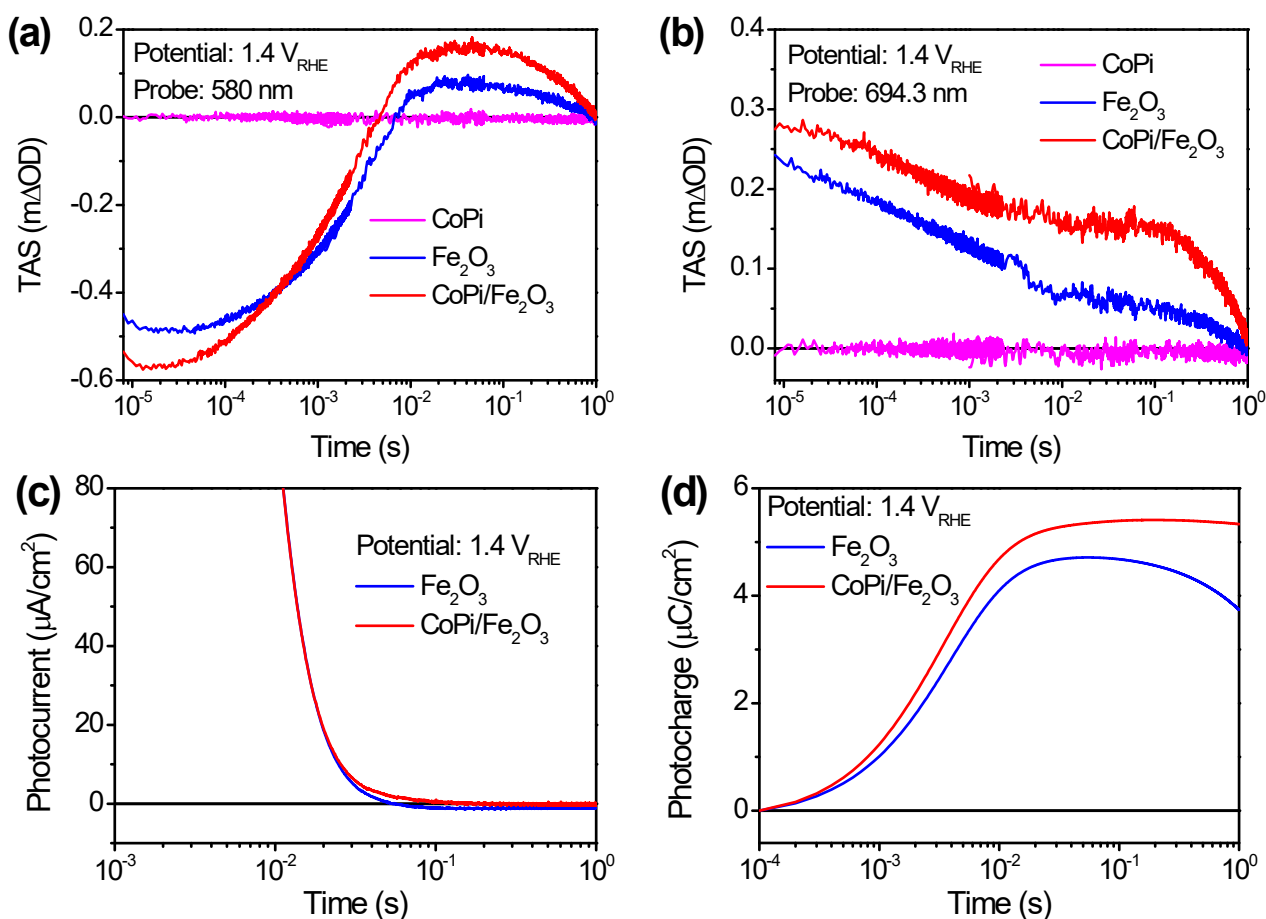

Fig. S11 TAS results at (a) 580 or (b) 694.3 nm of CoPi, bare Fe<sub>2</sub>O<sub>3</sub> and CoPi/Fe<sub>2</sub>O<sub>3</sub> photoanodes under 1.4 V<sub>RHE</sub>. (c) (d) TPC results of bare Fe<sub>2</sub>O<sub>3</sub> and CoPi/Fe<sub>2</sub>O<sub>3</sub> photoanodes excited by nanosecond laser pulse under 1.4 V<sub>RHE</sub>.

Above transient results excited by nanosecond laser pulse reproduce previous spectroscopic results of James R. Durrant group<sup>3, 12</sup>. Wherein, high potential will induce long-lived holes (positive absorption at 694.3 nm) on hematite surface and empty partially intrinsic electrons of trap states (negative absorption at 580 nm) in space charge region of hematite. Loading CoPi electrocatalyst can produce long-lived holes and empty intrinsic electrons under lower potential than pristine hematite. TPC results demonstrate that pristine hematite possesses severe back recombination

(negative TPC), which can be partially suppressed by loading CoPi electrocatalyst.



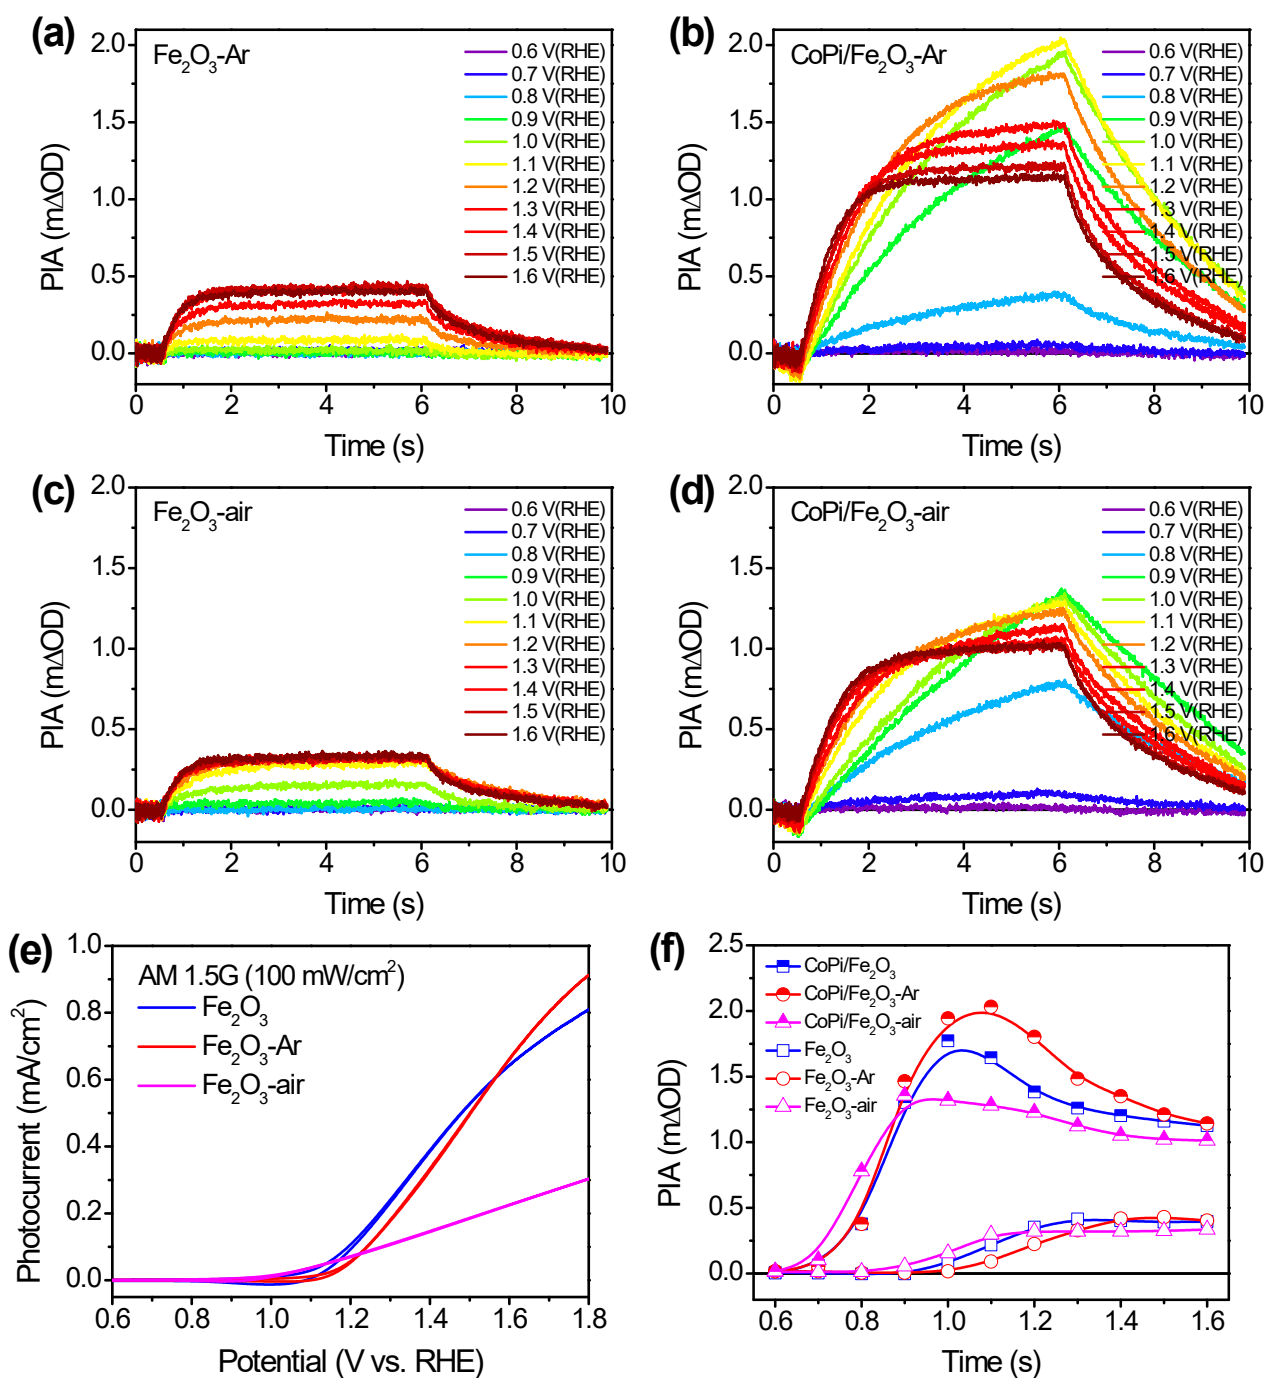

Fig. S12 Potential-dependent PIA responses under chopped illumination (blue LED: 456 nm, 5 mW/cm<sup>2</sup>) for bare  $\text{Fe}_2\text{O}_3\text{-Ar}$  (a),  $\text{CoPi}/\text{Fe}_2\text{O}_3\text{-Ar}$  (b), bare  $\text{Fe}_2\text{O}_3\text{-air}$  (c) and  $\text{CoPi}/\text{Fe}_2\text{O}_3\text{-air}$  (d). (e) LSV curves for bare  $\text{Fe}_2\text{O}_3$ ,  $\text{Fe}_2\text{O}_3\text{-Ar}$  and  $\text{Fe}_2\text{O}_3\text{-air}$  photoanodes under AM 1.5G illumination. (f) Potential-dependent PIA response for  $\text{Fe}_2\text{O}_3$ ,  $\text{Fe}_2\text{O}_3\text{-Ar}$  and  $\text{Fe}_2\text{O}_3\text{-air}$  photoanodes under illumination of 456 nm (5 mW/cm<sup>2</sup>). Probe wavelength: 694.3 nm.

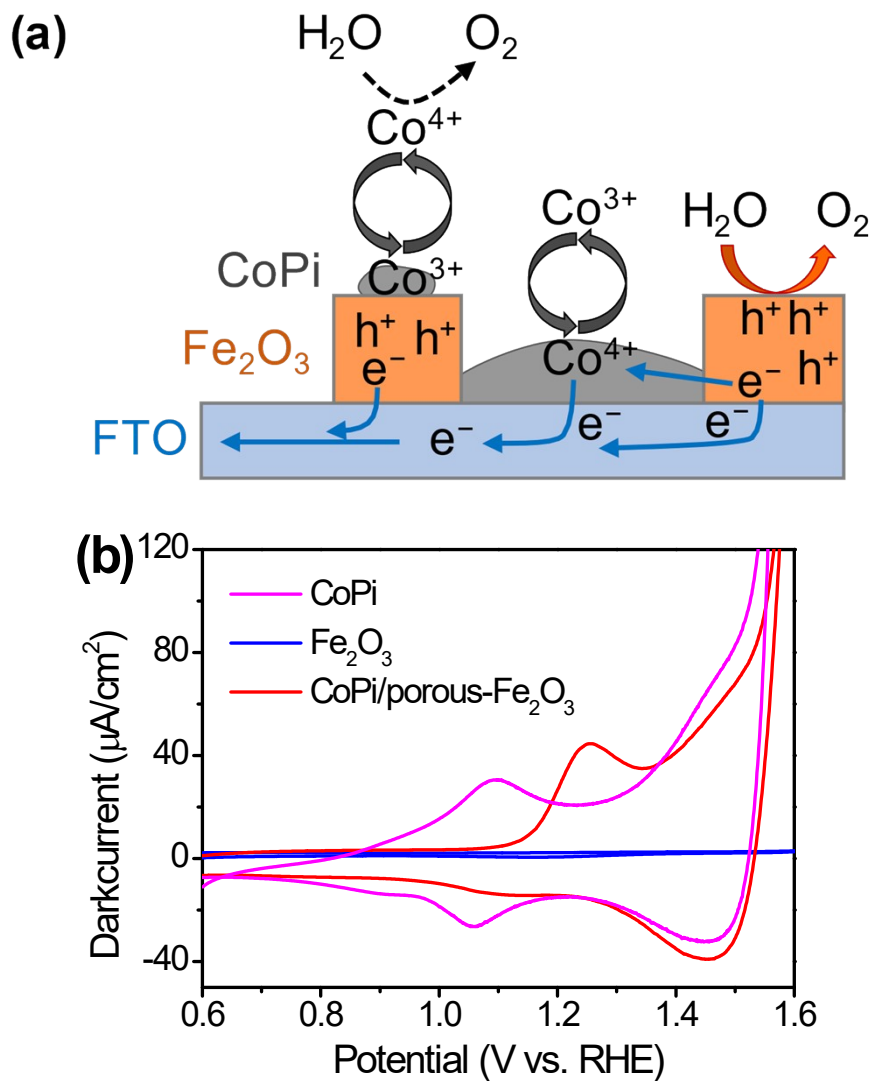

Fig. S13 (a) Schematic of contact between conductive substrate (FTO) and coating electrocatalyst (CoPi) resulting in electron shunt. (c) CV curves of porous Fe<sub>2</sub>O<sub>3</sub> photoanodes with/without CoPi coating.

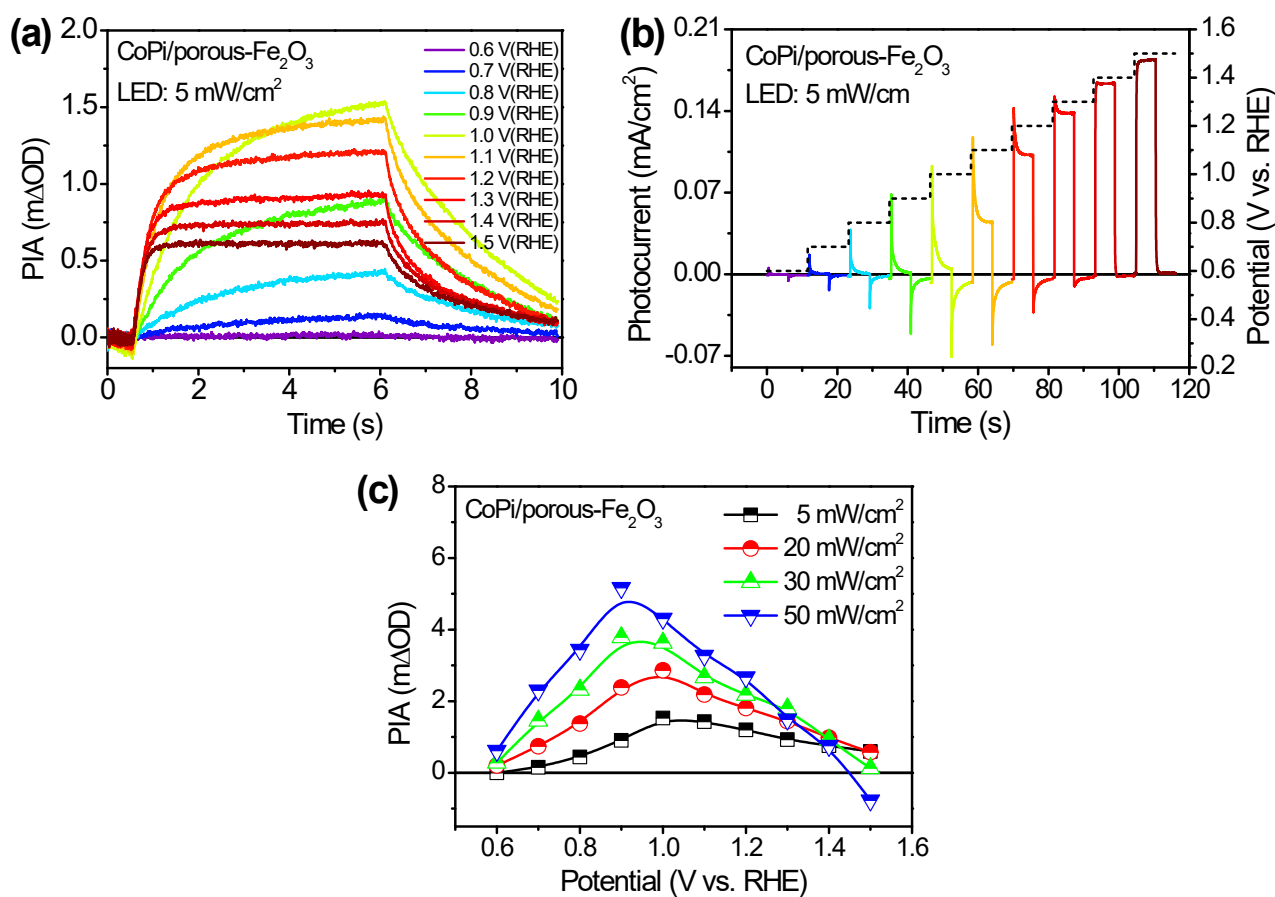

Fig. S14 (a) Potential-dependent PIA spectra and (b) chopped photocurrents for CoPi/porous-Fe<sub>2</sub>O<sub>3</sub>. Pump wavelength is 456 nm (5 mW/cm<sup>2</sup>); probe wavelength is 694.3 nm; colors of curves at different potential in Fig. S14a and S14b are identical. (c) Light-intensity-dependent PIA spectra of porous Fe<sub>2</sub>O<sub>3</sub> with loaded CoPi under increased potential.

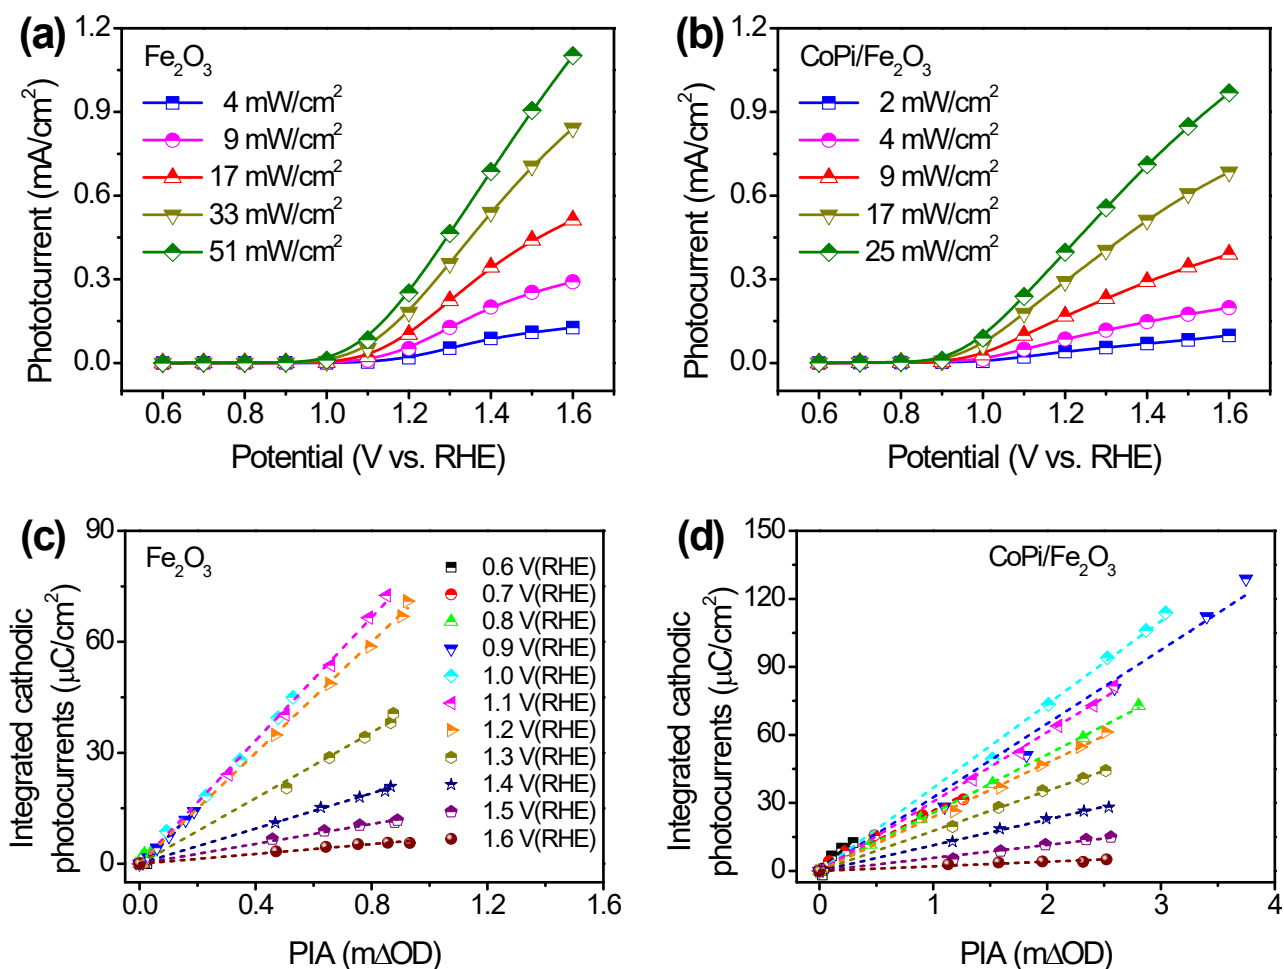

Fig. S15 The corresponding photocurrents during light-intensity-dependent PIA measurements for (a) bare Fe<sub>2</sub>O<sub>3</sub> and (b) CoPi/Fe<sub>2</sub>O<sub>3</sub> photoanodes. Linear relationship of PIA intensity and the integrated cathodic photocurrents for (c) bare Fe<sub>2</sub>O<sub>3</sub> and (d) CoPi/Fe<sub>2</sub>O<sub>3</sub> photoanodes. Colors of lines at different potential in Fig. S15a and S15b are identical.

According to the rate law ( $J = k \cdot [h^+]^\beta$ ,  $\log(J) = \log(k) + \beta \cdot \log([h^+])$ ), if two types of holes are present, rate law should be  $\log(J) = \log(k) + \beta \cdot \log([h^+]_{\text{active}})$ . PIA spectra concurrently monitor active and inactive holes, that's,  $\text{PIA}_{\text{total}} = \text{PIA}_{\text{active}} + \text{PIA}_{\text{inactive}}$ , where inactive holes are trapped holes of Fe<sub>2</sub>O<sub>3</sub> and/or oxidized cobalt. The integrated

cathodic photocurrents from TPC results can be deemed as inactive hole density, because cathodic photocurrent spike is originated from back recombination.<sup>13</sup> The total PIA amplitudes and the integrated cathodic photocurrents show a linear relation at a fixed potential, as shown in Fig. S15c and S15d. Thus,  $PIA_{inactive} = k_1 \cdot PIA_{total}$  ( $0 < k_1 < 1$ ). Then,  $PIA_{active} = (1 - k_1) \cdot PIA_{total}$ . When PIA amplitude can be denoted to hole density, rate law is  $\log(J) = \log(k') + \beta \cdot \log(PIA_{active}) = \log(k') + \beta \cdot \log((1 - k_1) \cdot PIA_{total}) = \log(k') + \beta \cdot \log(1 - k_1) + \beta \cdot \log(PIA_{total})$ . Therefore, due to scaling relationship between total hole density and (in)active hole density at a fixed potential, the rate law analysis of  $Fe_2O_3$  and  $CoPi/Fe_2O_3$  photoanodes is valid.

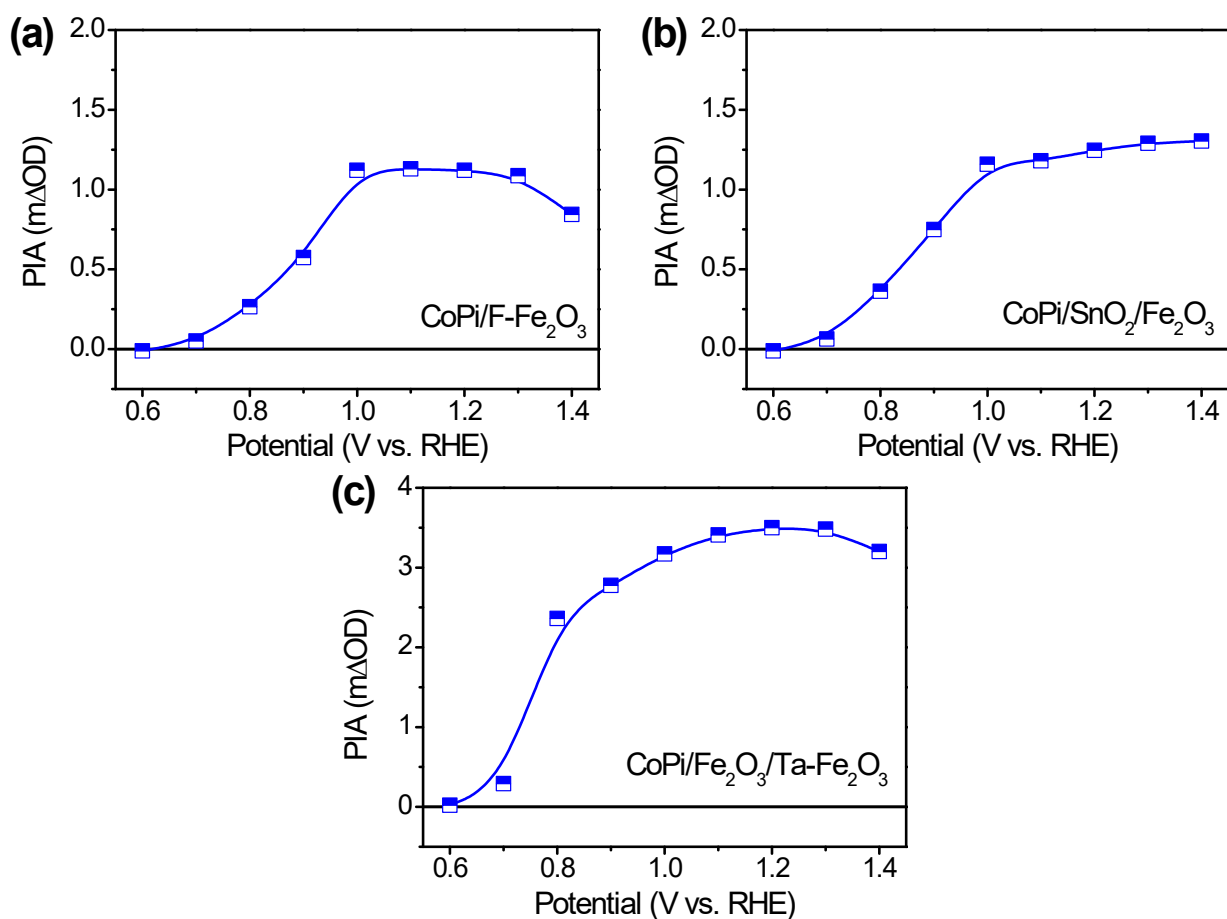

Fig. S16 Potential-dependent PIA response of four CoPi-modified hematite photoanodes. (a) CoPi/F-Fe<sub>2</sub>O<sub>3</sub>, (b) CoPi/SnO<sub>2</sub>/Fe<sub>2</sub>O<sub>3</sub> and (c) CoPi/Fe<sub>2</sub>O<sub>3</sub>/Ta-Fe<sub>2</sub>O<sub>3</sub>. Pump wavelength is 456 nm (5 mW/cm<sup>2</sup>) and probe wavelength is 694.3 nm.

The adverse recombination processes of surface states will be released by several strategies influencing photogenerated electrons on/near hematite surface. In Fig. S16a, decreasing density of surface states by surface covalent doping with fluorine (CoPi/F-Fe<sub>2</sub>O<sub>3</sub>) induces a platform of PIA response at 1.0–1.3 V<sub>RHE</sub> instead of the PIA peak in CoPi/Fe<sub>2</sub>O<sub>3</sub>. After surface insulator modification on hematite surface (CoPi/SnO<sub>2</sub>/Fe<sub>2</sub>O<sub>3</sub>) in Fig. S16b, the reverse electron transfer between Fe<sub>2</sub>O<sub>3</sub> and CoPi will be greatly suppressed due to blocking of SnO<sub>2</sub>, resulting in gradually increasing

PIA intensity in potential-dependent PIA response in line with monodirectional hole transfer process. In addition, since constructing build-in electric field near  $\text{Fe}_2\text{O}_3$  surface ( $\text{CoPi}/\text{Fe}_2\text{O}_3/\text{Ta-Fe}_2\text{O}_3$ ) can drive surface photoinduced electrons into  $\text{Fe}_2\text{O}_3$  bulk, a delayed PIA peak at 1.2~1.3  $V_{\text{RHE}}$  is observed. From the potential-dependent PIA response of three CoPi-modified hematite photoanodes in Fig. S16, three strategies do achieve the aim that regulating surface states will influence surface recombination processes. Wherein, disappeared PIA peak for  $\text{CoPi}/\text{SnO}_2/\text{Fe}_2\text{O}_3$  photoanode illustrates that the back recombination processes are strongly suppressed.

## References

1. J. Y. Kim, D. H. Youn, K. Kang and J. S. Lee, *Angew. Chem. Int. Ed.*, 2016, **55**, 10854-10858.
2. Z. Wang, G. Liu, C. Ding, Z. Chen, F. Zhang, J. Shi and C. Li, *J. Phys. Chem. C*, 2015, **119**, 19607-19612.
3. M. Barroso, C. A. Mesa, S. R. Pendlebury, A. J. Cowan, T. Hisatomi, K. Sivula, M. Gratzel, D. R. Klug and J. R. Durrant, *Proc. Natl. Acad. Sci. U. S. A.*, 2012, **109**, 15640-15645.
4. C. G. Morales-Guio, L. Liardet and X. Hu, *J. Am. Chem. Soc.*, 2016, **138**, 8946-8957.
5. Z. Wang, X. Mao, P. Chen, M. Xiao, S. A. Monny, S. Wang, M. Konarova, A. Du and L. Wang, *Angew. Chem. Int. Ed.*, 2019, **58**, 1030-1034.
6. S. Chen, J. Bai, X. Nurimaimaiti, J. Wang, Y. Zhang, T. Zhou, J. Li and B. Zhou, *Nano Energy*, 2020, **78**.
7. H. Zhang, D. Li, W. J. Byun, X. Wang, T. J. Shin, H. Y. Jeong, H. Han, C. Li and J. S. Lee, *Nat. Commun.*, 2020, **11**, 4622.
8. T. Hisatomi, H. Dotan, M. Stefik, K. Sivula, A. Rothschild, M. Gratzel and N. Mathews, *Adv. Mater.*, 2012, **24**, 2699-2702.
9. H. Yin, D. Li, X. Wang and C. Li, *J. Phys. Chem. C*, 2021, **125**, 8369-8375.
10. L. Francas, S. Corby, S. Selim, D. Lee, C. A. Mesa, R. Godin, E. Pastor, I. E. L. Stephens, K. S. Choi and J. R. Durrant, *Nat. Commun.*, 2019, **10**, 5208.



11. J. Bisquert, A. Zaban, M. Greenshtein and I. Mora-Seró, *J. Am. Chem. Soc.*, 2004, **126**, 13550-13559.
12. F. Le Formal, S. R. Pendlebury, M. Cornuz, S. D. Tilley, M. Gratzel and J. R. Durrant, *J. Am. Chem. Soc.*, 2014, **136**, 2564-2574.
13. J. Li, W. Wan, C. A. Triana, Z. Novotny, J. Osterwalder, R. Erni and G. R. Patzke, *J. Am. Chem. Soc.*, 2019, **141**, 12839-12848.
